# Supplementary material
Source: PubMed Central journal article supplement (PMC2708097)
Supplement: jm900186m_si_001.pdf [file jm900186m_si_001.pdf]

Supporting Information

**Conformationally Constrained Analogues of Diacylglycerol (DAG). 31. Modulation of the Biological Properties of Diacylglycerol Lactones (DAG-lactones) Containing Rigid-Rod Acyl Groups Separated From the Core Lactone by Spacer Units of Different Lengths**

*Maria J. Comin,<sup>1</sup> Gabriella Czifra,<sup>2</sup> Noemi Kedei,<sup>2</sup> Nancy E. Lewin,<sup>2</sup> Sofiya Kolusheva,<sup>3</sup> Julia F. Velasquez,<sup>2</sup> Ryan Kobylarz,<sup>2</sup> Raz Jelinek,<sup>3</sup> Peter M. Blumberg,<sup>2</sup> and Victor E. Marquez<sup>1\*</sup>*

Table of Contents

|                                                           |    |
|-----------------------------------------------------------|----|
| <sup>1</sup> H and <sup>13</sup> C spectra of <b>1a</b> . | S2 |
| <sup>1</sup> H and <sup>13</sup> C spectra of <b>1b</b> . | S3 |
| <sup>1</sup> H and <sup>13</sup> C spectra of <b>1c</b> . | S4 |

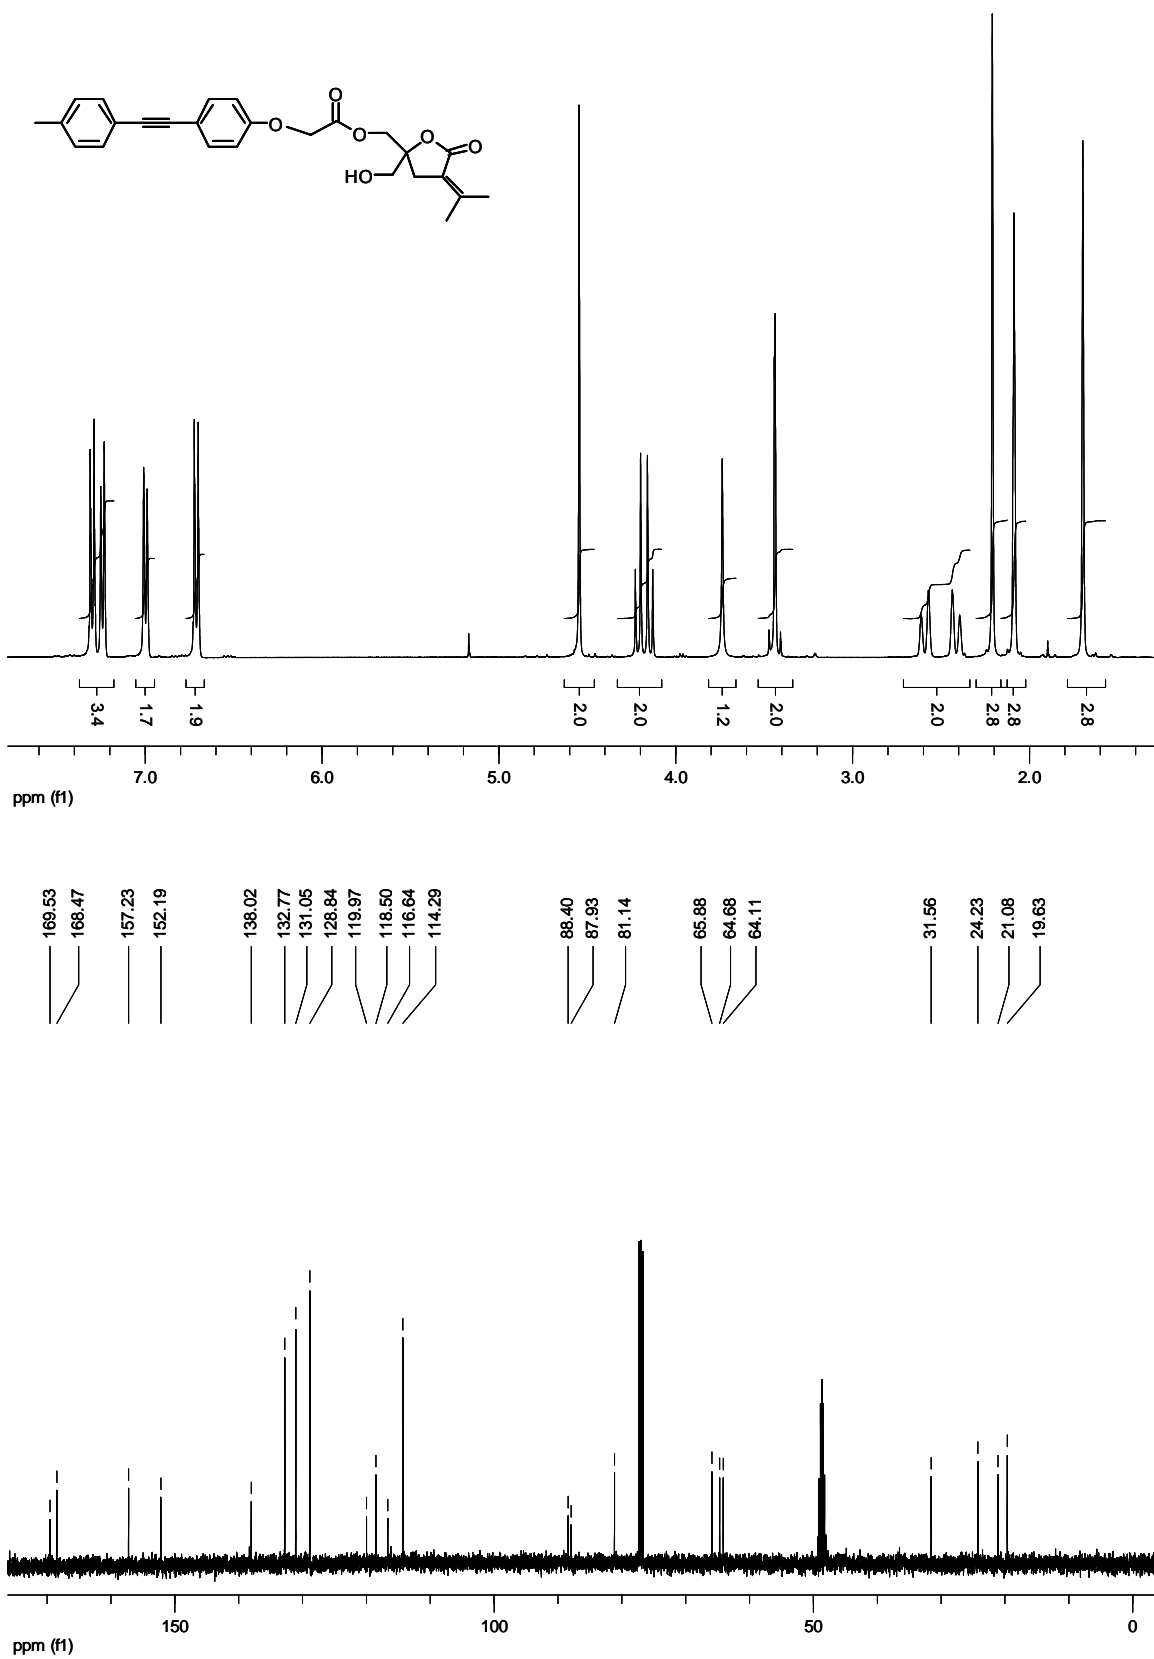

**<sup>1</sup>H and <sup>13</sup>C spectra of **1a**.**

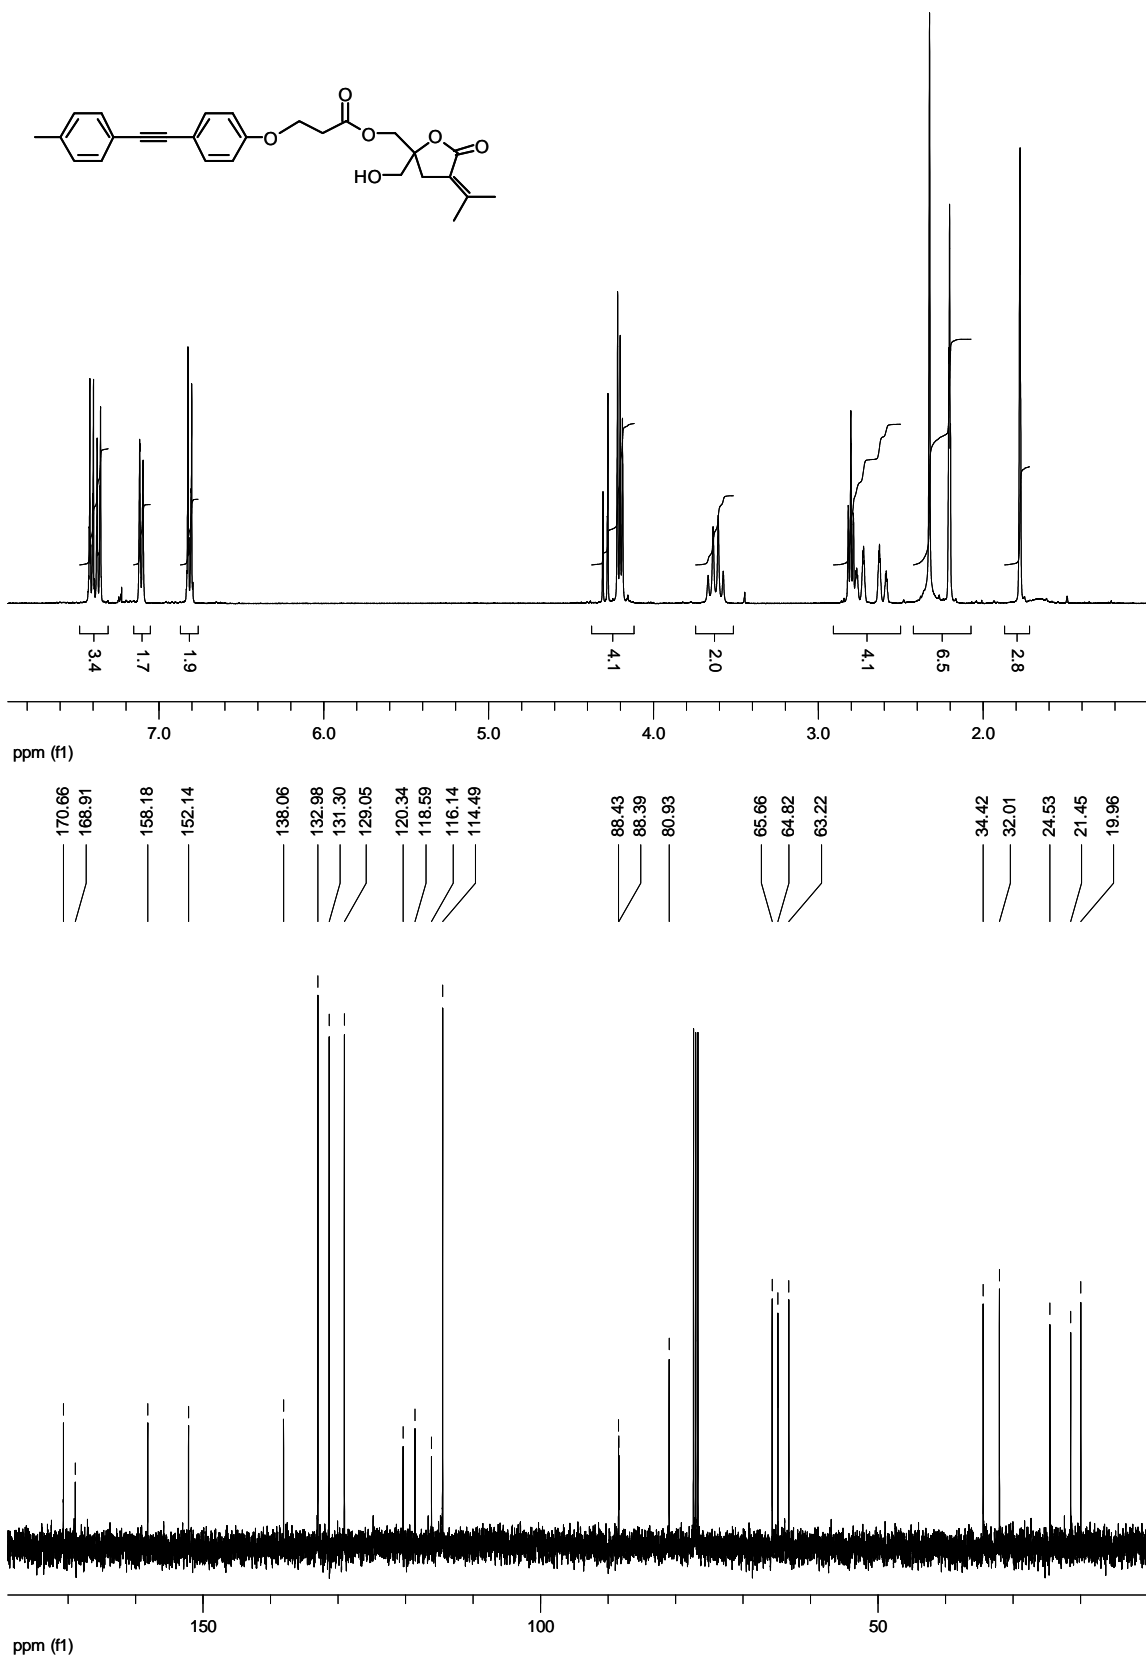

<sup>1</sup>H and <sup>13</sup>C spectra of **1b**.

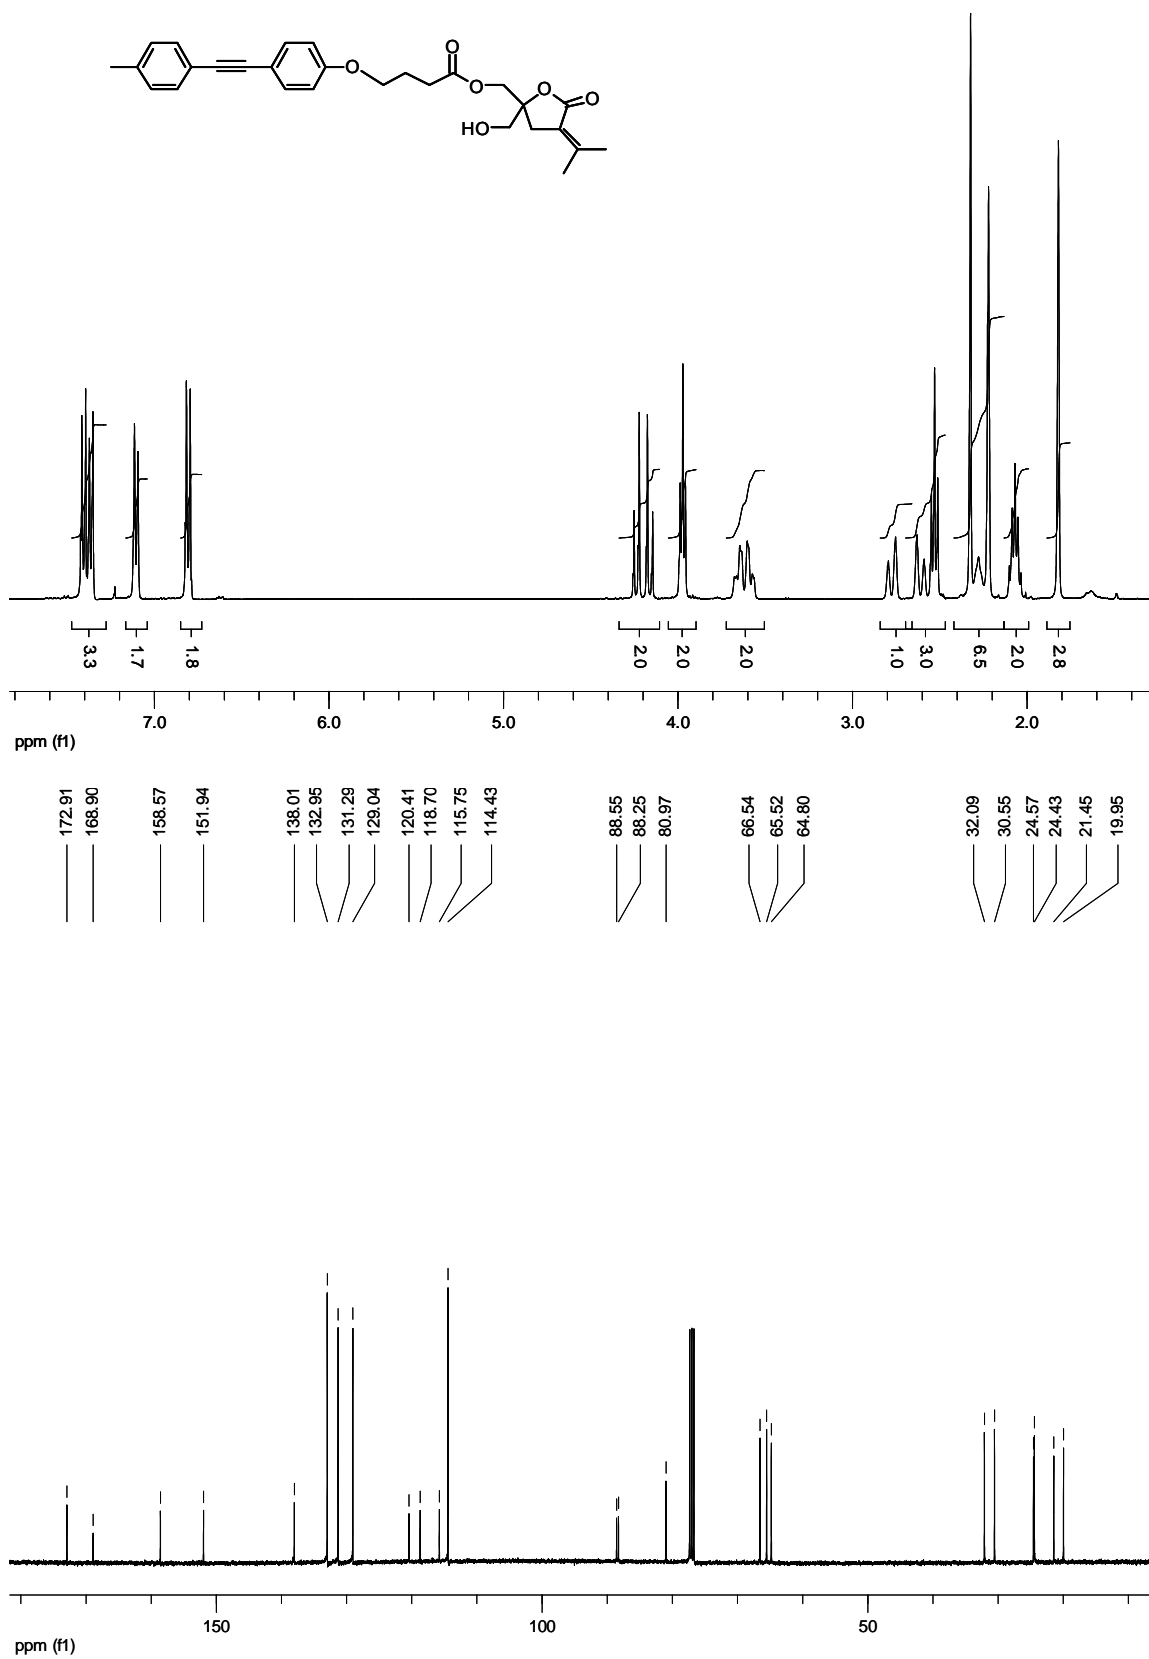

<sup>1</sup>H and <sup>13</sup>C spectra of **1c**.
